# Supplementary material for: Ethanol exposure increases mutation rate through error-prone polymerases
Source: PubMed Central journal article supplement (PMC7374746; doi:10.1038/s41467-020-17447-3), 2020-07-21
Supplement: 41467_2020_17447_MOESM3_ESM.pdf [file 41467_2020_17447_MOESM3_ESM.pdf]

## Description of Additional Supplementary Files

File Name: Supplementary Data 1

Description: Mutations identified in  $\text{can}^R$  colonies after exposure to 0 or 6% ethanol.

File Name: Supplementary Data 2

Description: List of genes differentially expressed in ethanol. Tabs indicate the different comparisons between conditions, with T0 = start timepoint, E2 = 2 generations in ethanol, E4 = 4 generations in ethanol, G2 = 2 generations in glucose, G4 = 4 generations in glucose. Different headers represent gene name, locus, value 1 (transcript abundance value in condition 1), value 2 (transcript abundance value in condition 2),  $\log_2(\text{fold\_change})$ , p-value (uncorrected pvalue), Q-value (FDR-adjusted p-value; using Benjamini-Hochberg correction for multiple-testing).

File Name: Supplementary Data 3

Description: Clusters of terms enriched in differentially expressed genes. Tabs indicate the different comparisons between conditions, with T0 = start timepoint, E2 = 2 generations in ethanol, E4 = 4 generations in ethanol, G2 = 2 generations in glucose, G4 = 4 generations in glucose.
